# Supplementary material
Source: bioRxiv or medRxiv preprint supplement (http://medrxiv.org/highwire/filestream/97788/field_highwire_adjunct_files/0/2020.09.21.20198408-1.pdf)
Supplement: Supplementary file [file 2020.09.21.20198408-1.pdf]

## The Copenhagen Burnout Inventory (CBI)- Brazilian version

### **Burnout Pessoal**

**PB1 Com que frequência você se sente cansado (a)?**

- Sempre
- Frequentemente
- Às vezes
- Raramente
- Nunca

**PB2 Com que frequência você fica exausto (a) fisicamente?**

- Sempre
- Frequentemente
- Às vezes
- Raramente
- Nunca

**PB3 Com que frequência você fica exausto(a) emocionalmente?**

- Sempre
- Frequentemente
- Às vezes
- Raramente
- Nunca

**PB4 Com que frequência você pensa: “Eu não aguento mais”?**

- Sempre
- Frequentemente
- Às vezes
- Raramente
- Nunca

Copyright Kristensen TS et al.

Traduzido e adaptado por Moser CM, Tietbohl-Santos B, Nunes K, Terra L, Hauck S.

**PB5 Com que frequência você se sente esgotado(a)?**

- Sempre
- Frequentemente
- Às vezes
- Raramente
- Nunca

**PB6 Com que frequência você se sente fraco(a) e suscetível à doença?**

- Sempre
- Frequentemente
- Às vezes
- Raramente
- Nunca

**Burnout relacionado ao trabalho**

**WB1 Você se sente esgotado(a) no fim de um dia de trabalho?**

- Sempre
- Frequentemente
- Às vezes
- Raramente
- Nunca

**WB2 Você fica exausto(a) pela manhã ao pensar em mais um dia de trabalho?**

- Sempre
- Frequentemente
- Às vezes
- Raramente
- Nunca

**WB3 Você se sente mais cansado a cada hora de trabalho?**

- Sempre
- Frequentemente
- Às vezes
- Raramente
- Nunca

**WB4 Você tem energia suficiente para família e amigos durante os momentos de lazer?**

- Sempre
- Frequentemente
- Às vezes
- Raramente
- Nunca

**WB5 O seu trabalho é exaustivo emocionalmente?**

- Em um grau muito alto
- Em um grau alto
- Em algum grau
- Em baixo grau
- Em um grau muito baixo

**WB6 O seu trabalho lhe frustra?**

- Em um grau muito alto
- Em um grau alto
- Em algum grau
- Em baixo grau
- Em um grau muito baixo

**WB7 Você se sente esgotado por causa do seu trabalho?**

- Em um grau muito alto
- Em um grau alto

- Em algum grau
- Em baixo grau
- Em um grau muito baixo

**Burnout relacionado ao cliente/paciente**

**CB1 Você acha difícil trabalhar com pessoas?**

- Em um grau muito alto
- Em um grau alto
- Em algum grau
- Em baixo grau
- Em um grau muito baixo

**CB2 Trabalhar com pessoas suga a sua energia?**

- Em um grau muito alto
- Em um grau alto
- Em algum grau
- Em baixo grau
- Em um grau muito baixo

**CB3 Você acha frustrante trabalhar com pessoas?**

- Em um grau muito alto
- Em um grau alto
- Em algum grau
- Em baixo grau
- Em um grau muito baixo

**CB4 Você sente que está dando mais do que recebe quando você trabalha com as pessoas?**

- Em um grau muito alto
- Em um grau alto
- Em algum grau
- Em baixo grau
- Em um grau muito baixo

**CB5 Você está cansado(a) de trabalhar com pessoas?**

- Sempre
- Frequentemente
- Às vezes
- Raramente
- Nunca

**CB6 Você às vezes se pergunta quanto tempo será capaz de continuar trabalhando com pessoas?**

- Sempre
- Frequentemente
- Às vezes
- Raramente
- Nunca
